# Supplementary material for: Optimizing locked nucleic acid modification in double-stranded biosensors for live single cell analysis
Source: Royal Society of Chemistry journal article supplement (doi:10.1039/d1an01802g), 2022-01-01
Supplement: d1an01802g1.pdf [file d1an01802g1.pdf]

## Supplementary Information

### Optimizing locked nucleic acid modification in double-stranded biosensors for live single cell analysis

*Samuel A Vilchez Mercedes<sup>1,||</sup>, Ian Eder<sup>1,||</sup>, Mona Ahmed<sup>1</sup>, Ninghao Zhu<sup>1</sup>, and Pak Kin Wong<sup>1,2</sup>*

<sup>1</sup>Department of Biomedical Engineering, The Pennsylvania State University, University Park, PA, USA

<sup>2</sup>Department of Mechanical Engineering and Department of Surgery, The Pennsylvania State University, University Park, PA, USA

*||*These authors contributed equally to this work

#### Corresponding author:

Pak Kin Wong, Department of Biomedical Engineering, Department of Mechanical Engineering and Department of Surgery, The Pennsylvania State University, 516 Chemical and Biomedical Engineering Building, University Park, PA, USA.

Email: pak@engr.psu.edu

#### Keywords

Homogeneous biosensor, molecular beacon, 3D culture, spheroid, HeLa.

**Table 1.** Nucleic sequences for the dsLNA biosensor.

|                                    |                                          |
|------------------------------------|------------------------------------------|
| $\beta$ -actin Probe               | /5Alex647N/AG+GT+TT+TG+TC+AA+GA+AA+GG+GT |
| $\beta$ -actin Quencher 1 (4-LNA)  | GA+CA+AA+AC+CT/3IAbRQSp/                 |
| $\beta$ -actin Quencher 2 (3-LNA)  | GACA+AA+AC+CT/3IAbRQSp/                  |
| $\beta$ -actin Quencher 3 (2S-LNA) | GACA+AAAC+CT/3IAbRQSp/                   |
| $\beta$ -actin Quencher 4 (2A-LNA) | GACAAA+AC+CT/3IAbRQSp/                   |
| $\beta$ -actin Quencher 5 (1-LNA)  | GACAAAAC+CT/3IAbRQSp/                    |
| $\beta$ -actin Quencher 6 (DNA)    | GACAAAACCT/3IAbRQSp/                     |
| $\beta$ -actin Target              | ACCCTTTCTTGACAAAACCT                     |
| $\beta$ -actin Mismatch target     | ACCCTTTCTCGACAAAACCT                     |
| Random Probe                       | /5Alex647N/AC+GC+GA+CA+AG+CG+CA+CC+GA+TA |
| Random Quencher 1 (4-LNA)          | CT+TG+TC+GC+GT/3IAbRQSp/                 |
| Random Quencher 2 (3-LNA)          | CTTG+TC+GC+GT/3IAbRQSp/                  |
| Random Quencher 4 (2S-LNA)         | CTTG+TCGC+GT/3IAbRQSp/                   |
| Random Quencher 3 (2A-LNA)         | CTTGTC+GC+GT/3IAbRQSp/                   |
| Random Quencher 5 (1-LNA)          | CTTGTCGC+GT/3IAbRQSp/                    |
| Random Quencher 6 (DNA)            | CTTGTCGCGT/3IAbRQSp/                     |
| Random Target                      | TATCGGTGCGCTTGTCGCGT                     |

Sequences are in the 5' to 3' direction; + indicates LNA monomers.

**Table 2.** Statistics for data in Figure 4B and D.

| $\beta$ -actin | 4 LNA | 3 LNA | 2 LNA - A | 2 LNA - S | 1 LNA | DNA  |
|----------------|-------|-------|-----------|-----------|-------|------|
| 4 LNA          |       | ****  | ****      | ****      | **    | ns   |
| 3 LNA          |       |       | ns        | ns        | ns    | **** |
| 2 LNA - A      |       |       |           | ns        | ns    | **** |
| 2 LNA - S      |       |       |           |           | ns    | ***  |
| 1 LNA          |       |       |           |           |       | *    |
| DNA            |       |       |           |           |       |      |

| Random    | 4 LNA | 3 LNA | 2 LNA - A | 2 LNA - S | 1 LNA | DNA |
|-----------|-------|-------|-----------|-----------|-------|-----|
| 4 LNA     |       | **    | **        | ns        | **    | ns  |
| 3 LNA     |       |       | ns        | ns        | ns    | ns  |
| 2 LNA - A |       |       |           | ns        | ns    | ns  |
| 2 LNA - S |       |       |           |           | ns    | ns  |
| 1 LNA     |       |       |           |           |       | ns  |
| DNA       |       |       |           |           |       |     |

A Brown-Forsythe and Welch ANOVA test and the Dunnett's T3 multiple comparisons test were used to evaluate differences among quenchers for a specific ratio. ns p-value > 0.05, \* p-value < 0.05, \*\* p-value < 0.01, \*\*\* p-value < 0.001, and \*\*\*\* p-value < 0.0001.

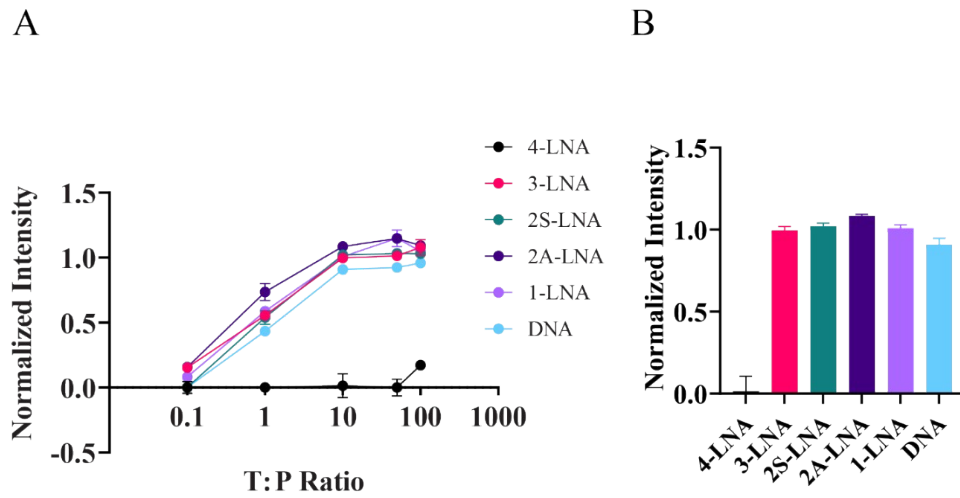

**Figure S1.  $\beta$ -actin probe specificity against a single base mismatch target evaluated for various quencher configurations.** Experimental characterization of the  $\beta$ -actin probe specificity against a mismatch target for the different quenchers. (A) Normalized intensity of the biosensor at multiple T:P ratios. (B) Bar chart of the normalized intensity of  $\beta$ -actin biosensor at a target-to-probe ratio of 10:1. The probe concentration is 250 nM. Error bars represent the standard deviation. A two-way ANOVA test was used to evaluate differences among quenchers and Q:P ratios. A Brown-Forsythe and Welch ANOVA test and the Dunnett's T3 multiple comparisons test were used to evaluate differences among quenchers for the T:P ratio of 10:1 (n=3).

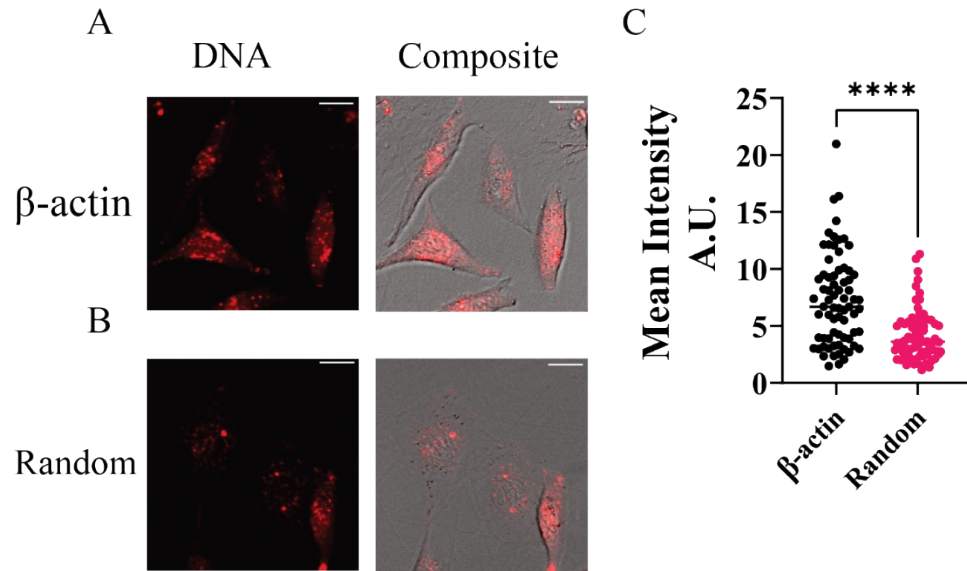

**Figure S2. DNA quencher demonstrates high specificity in live cells. (A-B)** Fluorescence and brightfield overlay images of HeLa cells transfected with (A)  $\beta$ -actin probe or (B) Random probe, respectively. Scale bars, 20  $\mu$ m. **(C)** Quantification of mean fluorescence intensity per cell for both cases. The nonparametric Mann-Whitney test was used to compare across groups. For each experiment  $n > 100$  cells per condition (\*\*\*\* $p < 0.0001$ ).

A

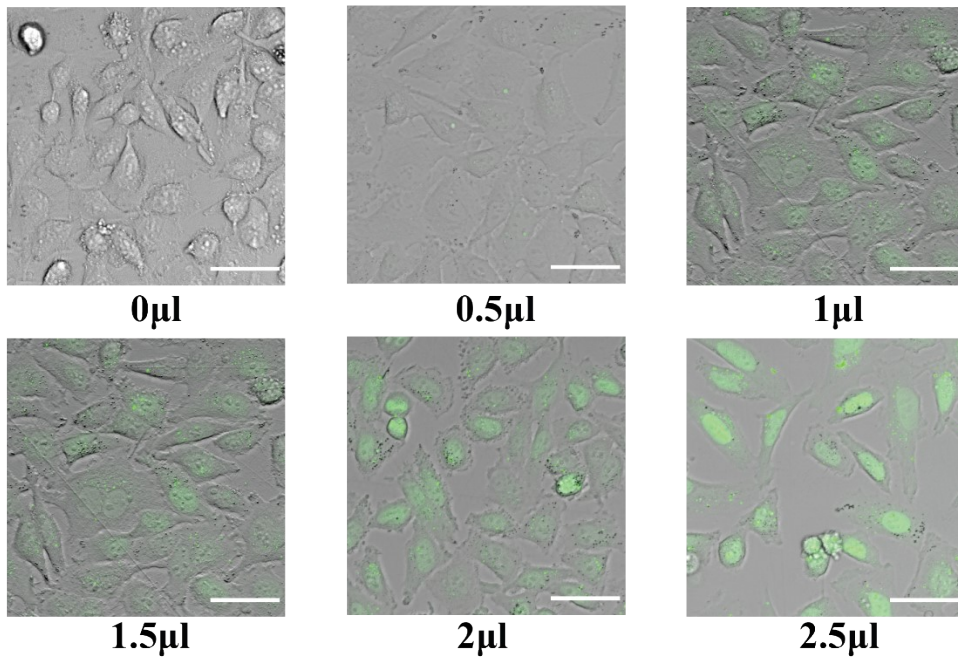

B

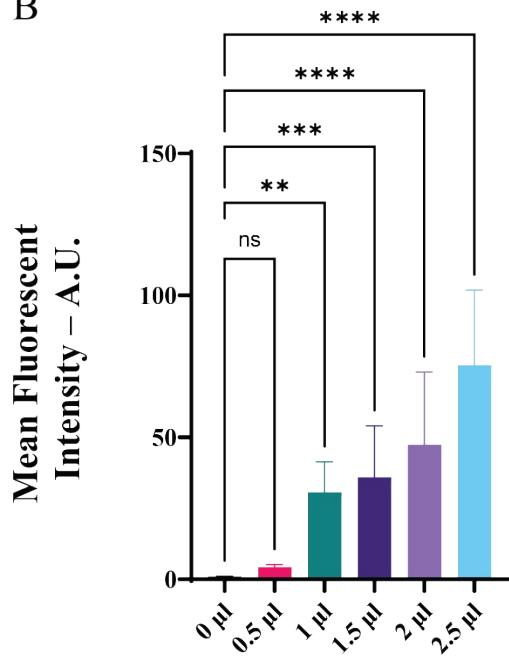

C

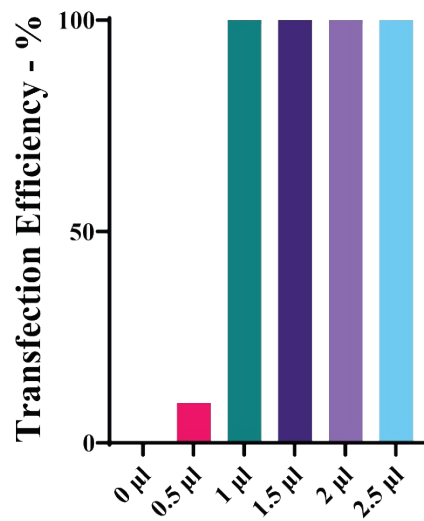

**Figure S3. RNAiMAX allows for high transfection efficiency in HeLa cells.** Block iT™, a non-targeting, fluorescent, double stranded RNA oligo was transfected with varying volumes of RNAiMAX in a 24 well plate according to manufacturer's protocol. Briefly, 6.5  $\mu$ l of Block-iT

(corresponding to approximately 1  $\mu\text{g}$  siRNA) was incubated over night with various volumes of RNAiMAX. Based on this optimization, subsequent experiments with dsLNA biosensors used 1.5 $\mu\text{l}$  RNAiMAX for transfection. **(A)** Representative images of HeLa cells transfected with Block iT<sup>™</sup>. Scale bars, 50  $\mu\text{m}$ . **(B)** Quantification of normalized mean fluorescence intensity per cell for each condition. All values were normalized to the mean fluorescent intensity of the 0  $\mu\text{l}$  RNAiMAX case. A one-way ANOVA test was used to compare between across groups. For each experiment  $n = 10$  cells per condition (\*\*  $p < 0.01$ , \*\*\*  $p < 0.001$  and \*\*\*\* $p < 0.0001$ ). **(C)** Percent of cells transfected with Block iT<sup>™</sup>.  $n > 200$  cells per condition.
